# Supplementary material for: Synthesis of Isophthalic Acid-Carbazole Coordination Poly-mers with Stackingdependent Ultralong Room Temperature Phosphorous and White-Light Emission
Source: Preprints.org preprint supplement (doi:10.20944/preprints202304.1017.v1), 2023-04-27
Supplement: Supplementary file 1 [file supplementary]

# **Supporting Information**

## **For**

### **Synthesis of isophthalic acid-carbazole coordination polymers with stacking-dependent ultralong room temperature phosphorescence and white-light emission**

Hong-Ru Fu,<sup>a\*</sup> Hong Chen,<sup>ab</sup> Kun Zhang,<sup>a</sup> Ting Li,<sup>a</sup> Xue-Li Zhu,<sup>a\*</sup>

<sup>a</sup>College of Chemistry and Chemical Engineering, Luoyang Normal University, Luoyang 471934, P. R. China.

<sup>b</sup>Luoyang Key Laboratory of Organic Functional Molecules, College of Food and Drug, Luoyang Normal University, Luoyang, Henan 471934, PR China.

**\* Corresponding E-mail :** *hongrufu2015@163.com, zhuxueli@hnu.edu.cn*

## 1. Experimental Section.

### Materials and Methods

### Synthesis of Compounds

### X-ray Crystal Structures

## 2. Supplementary Schemes and Figure

**Fig. S1** (a) The coordination environment of  $\text{Zn}^{2+}$  ions in compound 1; (b)  $\text{Zn}^{2+}$  ions was connected by CzIP to form a 1D chain; (c) 2D supramolecular structure of compound 1 built of 1D chains through noncovalent interactions; the packing of carbazole groups from the adjacent layers.

**Fig. S2** (a) The coordination environment of  $\text{Cd}^{2+}$  ions in compound 2; (b) the packing of carbazole fragments.

**Fig. S3** The hydrogen bonds were checked by MERCURY (a) and PLATON program; (b) There are no intramolecular and intermolecular hydrogen bonds.

**Fig. S4** (a) The coordination environment of four  $\text{Zn}^{+}$  ions in compound 3; (b) the coordination mode of CzIP.

**Fig. S5** The powder XRD spectra of compound 1 and the simulated powder XRD spectra from the single crystal of compound 1.

**Fig. S6** The powder XRD spectra of compound 1 and the simulated powder XRD spectra from the single crystal of compound 2.

**Fig. S7** The powder XRD spectra of compound 1 and the simulated powder XRD spectra from the single crystal of compound 3.

**Fig. S8** TG and DTG curves of compound 1.

**Fig. S9** TG and DTG curves of compound 2.

**Fig. S10** TG and DTG curves of compound 3.

**Fig. S11** The fluorescent behaviors of organic ligand CzIP in different concentrations. (a) in ethanol (EtOH) from  $1 \times 10^{-5}$  to  $1 \times 10^{-3}$  mol/L; (b) in N,N-Dimethylformamide (DMF) from  $1 \times 10^{-5}$  to  $1 \times 10^{-3}$  mol/L.

**Fig. S12** Fluorescence curves of compound 2 at 375, 412 and 467 nm.

**Fig. S13** Photoluminescence (PL) curves of compound 2.

**Fig. S14** Fluorescence lifetime profile of compound 1 at 465 nm.

**Fig. S15** Fluorescence lifetime profile of compound 2 at 375, 412 and 437 nm, respectively.

**Fig. S16** Phosphorescence spectra of as prepared crystals of compound 1 under the different temperatures without door-gated instrument.

**Fig. S17** Phosphorescence spectra of organic ligand compound CzIP in  $1 \times 10^{-5}$  mol/L chloroform at 77 K.

**Fig. S18** UV-Visible absorption spectra of organic ligand powder under ambient conditions.

**Fig. S19** UV-Visible absorption spectra of compounds 1-3 under ambient conditions.

**Fig. S20** Fluorescence excitation spectra of Compound 1 at  $E_m = 456$  nm.

**Fig. S21** Phosphorescent excitation spectra of Compound 1 at  $E_m = 547$  nm.

**Fig. S22** Fluorescence excitation spectra of Compound 2 at  $E_m = 436$  nm.

**Fig. S23** Phosphorescent excitation spectra of Compound 2 at  $E_m = 530$  and  $610$  nm.

### 3. Supplementary Tables

**Table S1.** Crystallographic data for compounds 1-3.

**Table S2.** CIE, RGB and HSV values for the luminous colors of compounds 1.

**Table S3.** CIE, RGB and HSV values for the luminous colors of compounds 2.

### 4. References

#### 1. EXPERIMENTAL SECTION

**Materials and Methods.** All chemical materials were obtained from commercial sources and used without further purification. 5-(carbazol-9-yl) isophthalate (CzIP) was synthesized by following the published method.<sup>1</sup> Powder X-ray diffraction (PXRD) patterns were acquired on a Bruker D8 ADVANCE diffractometer with Cu K $\alpha$  ( $\lambda = 1.5418$  Å) radiation in the range of  $\theta = 5$ – $50^\circ$  at room temperature. Thermogravimetric analysis (TGA) was performed on a PerkinElmer TG-7 analyzer heated from room temperature to  $750^\circ\text{C}$  at a ramp rate of  $5^\circ\text{C}/\text{min}$  under air atmosphere. Elemental analyses (C, H, and N) were conducted on a PerkinElmer 240C elemental analyzer. Ultraviolet-visible (UV-vis) absorption spectras were collected on a PerkinElmer Lambda 35 spectrophotometer. The luminescent and temperature-dependent phosphorescence spectra and quantum yields were measured on FLS1000 Edinburgh fluorescence spectrometer, and luminescence lifetimes were obtained on a single photon counting spectrometer with micro-second pulse lamp.

#### Synthesis of Compounds

**Compound 1** A mixture of CzIP (15 mg, 0.065 mmol), D-Cyclopentylglycine (15 mg, 0.10 mmol) and  $\text{Zn}(\text{NO}_3)_2 \cdot 6\text{H}_2\text{O}$  (60 mg, 0.20 mmol) were dissolved in  $\text{H}_2\text{O}$  and DMI (8 and 2 mL), the mixture were sealed in a Teflon-lined stainless steel container and heated at  $150^\circ\text{C}$  for 3 days, and then cooled to room temperature. Colorless prismatic crystals were obtained and collected by filtration. Anal. calcd (%) for  $\text{C}_{20}\text{H}_{11}\text{NO}_4\text{Zn}$ : C 60.80, H 2.79, N 3.55. Found (%): C 60.41, H 2.81, N 3.50.

**Compound 2** CzIP (15 mg, 0.065 mmol), D-Cyclopentylglycine (15 mg, 0.10 mmol) and  $\text{Cd}(\text{SO}_4)_2 \cdot 8\text{H}_2\text{O}$  (50 mg, 0.06 mmol) were dissolved in  $\text{H}_2\text{O}$  and DMI (8 and 2 mL), the mixture were sealed in a Teflon-lined stainless steel container and heated at  $150^\circ\text{C}$  for 3 days, and then cooled to room temperature. Colorless prismatic crystals were obtained and collected by filtration. The crystals were washed with DMF for three times to remove the surface impurities. Anal. calcd (%) for  $\text{C}_{25}\text{H}_{21}\text{CdN}_3\text{O}_5$ : C 53.97, H 3.78, N 7.55. Found (%): C 54.11, H 3.80, N 7.59.

**Compound 3** CzIP (15 mg, 0.065 mmol), D-Cyclopentylglycine (15 mg, 0.1 mmol) and  $\text{Cd}(\text{SO}_4)_2 \cdot 8\text{H}_2\text{O}$  (50 mg, 0.06 mmol) were dissolved in  $\text{H}_2\text{O}$  and EtOH (8 and 2 mL), the mixture were sealed in a Teflon-lined stainless steel container and heated at  $150^\circ\text{C}$  for 3 days, and then cooled to room temperature. Colorless prismatic crystals were obtained and collected by filtration.

The crystals were washed with DMF for three times to remove the surface impurities. Anal. calcd (%) for  $C_{40}H_{26}Cd_2N_2O_{10}$ : C 52.20, H 2.83, N 3.05. Found (%): C 52.39, H 2.88, N 3.04.

### X-ray Crystal Structures

The diffraction data were measured at 293 K under nitrogen flowing with Rigaku supernova CCD system equipped with a confocal monochromated Mo- $K\alpha$  radiation ( $\lambda = 0.71073 \text{ \AA}$ ). The structure was solved by a direct method and refined by full-matrix least-squares using SHELX-2014<sup>2</sup> and Olex2.0.<sup>3</sup> Non-hydrogen atoms were refined with anisotropic thermal displacement coefficients. All hydrogen atoms were located on the geometrically ideal positions and refined using a riding model. CCDC 2219861–2219863 for 1-3. The crystal structure parameters were listed in Table S1.

## 2. Supplementary Schemes and Figure

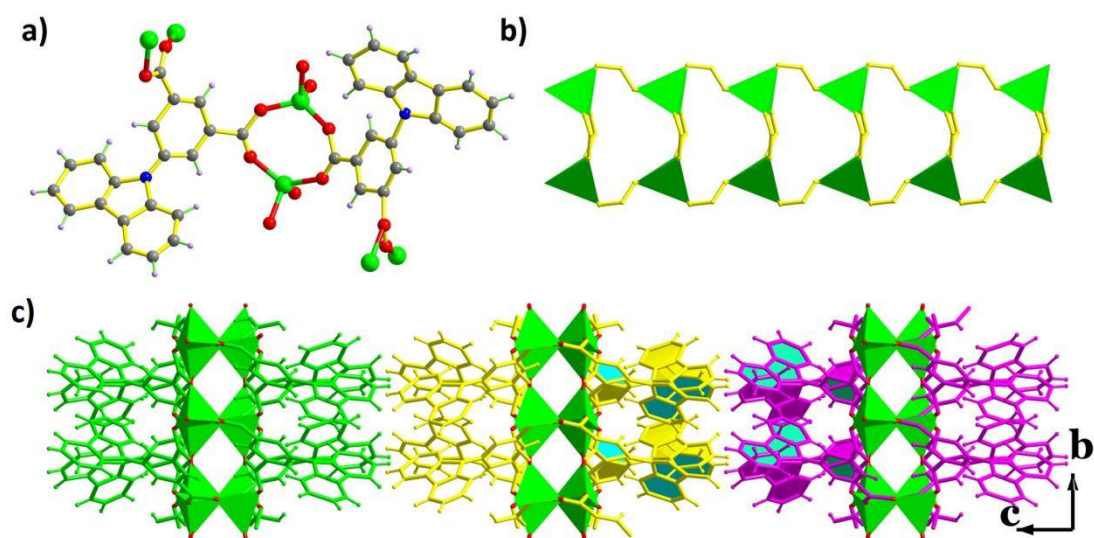

**Fig. S1** (a) The coordination environment of  $Zn^{2+}$  ions in compound 1; (b)  $Zn^{2+}$  ions was connected by CzIP to form a 1D chain; (c) 2D supramolecular structure of compound 1 built of 1D chains through noncovalent interactions; the packing of carbazole groups from the adjacent layers.

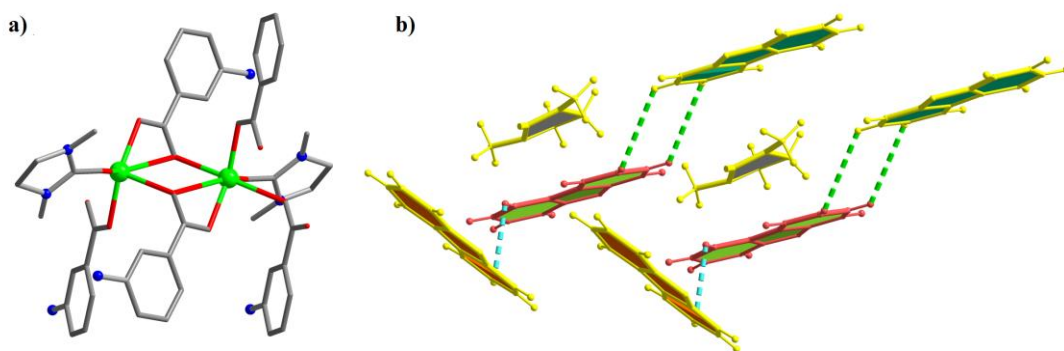

**Fig. S2** (a) The coordination environment of  $Cd^{2+}$  ions in compound 2; (b) the packing of carbazole fragments.

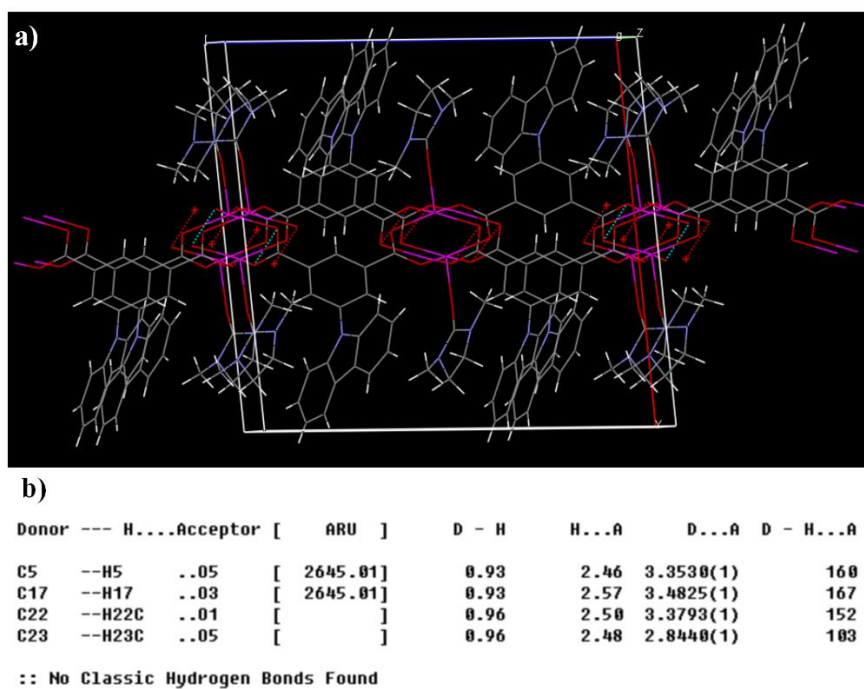

**Fig. S3** The hydrogen bonds were checked by MERCURY (a) and PLATON program; (b) There are no intramolecular and intermolecular hydrogen bonds.

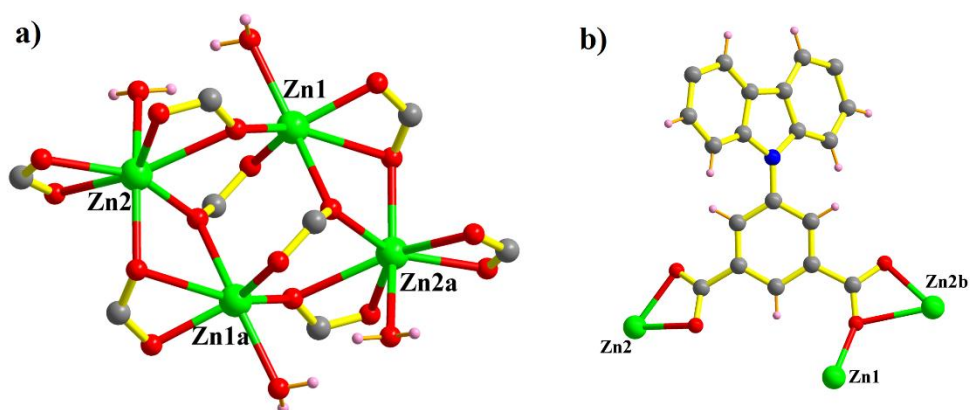

**Fig. S4** (a) The coordination environment of four  $\text{Zn}^{2+}$  ions in compound 3; (b) the coordination mode of CzIP.

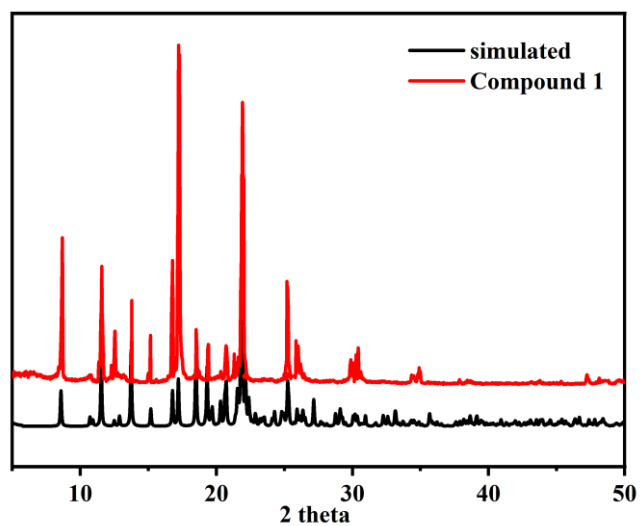

**Fig. S5** The powder XRD spectra of compound 1.

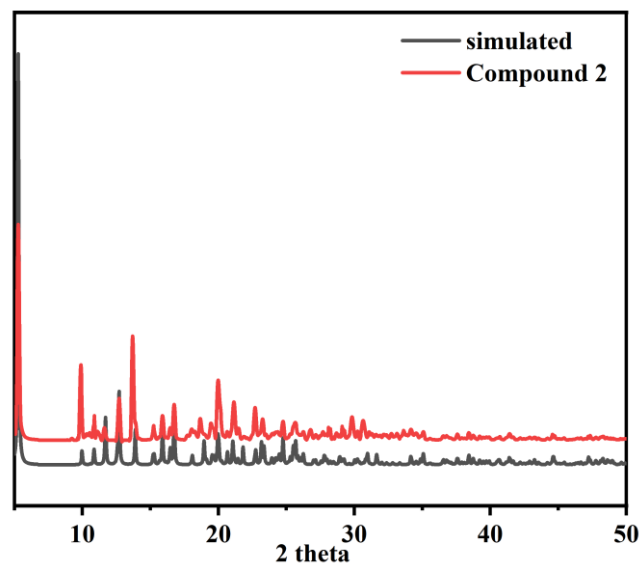

**Fig. S6** The powder XRD spectra of compound 2.

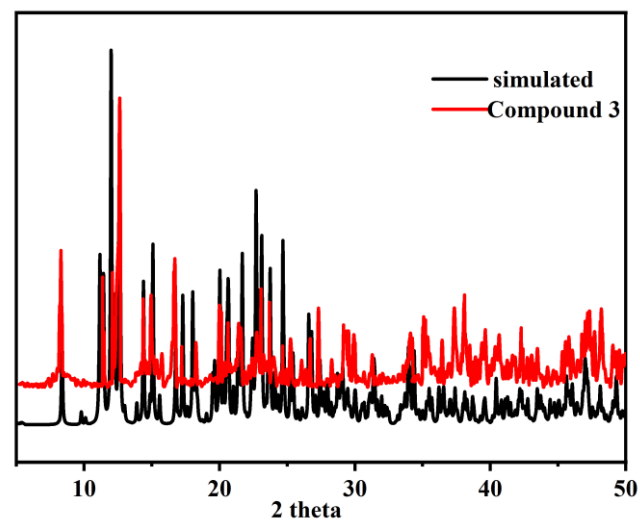

**Fig. S7** The powder XRD spectra of compound 3.

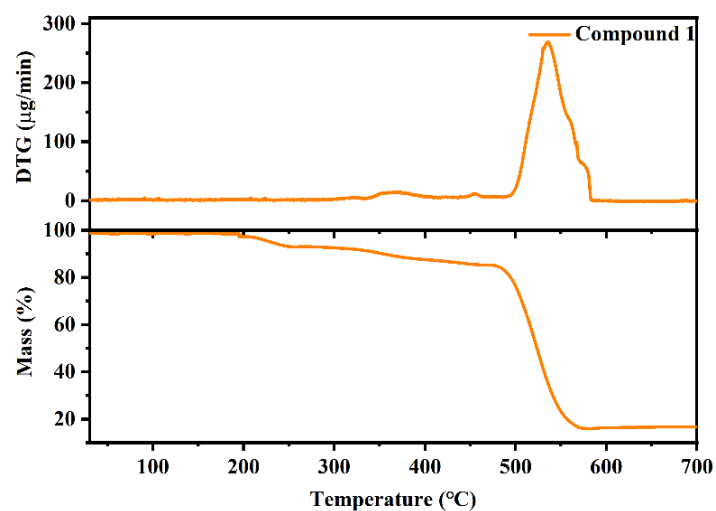

Fig. S8 TG and DTG curves of compound 1.

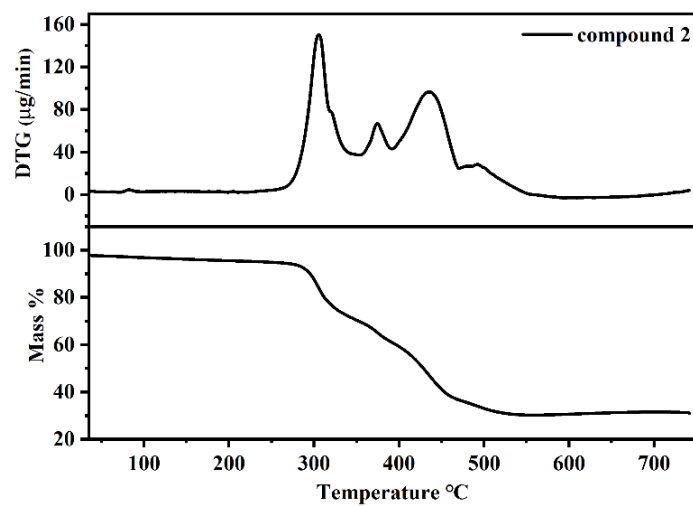

Fig. S9 TG and DTG curves of compound 2.

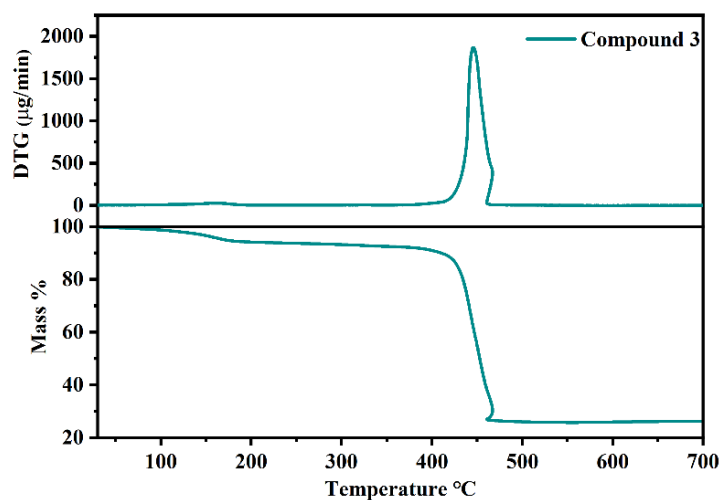

Fig. S10 TG and DTG curves of compound 3.

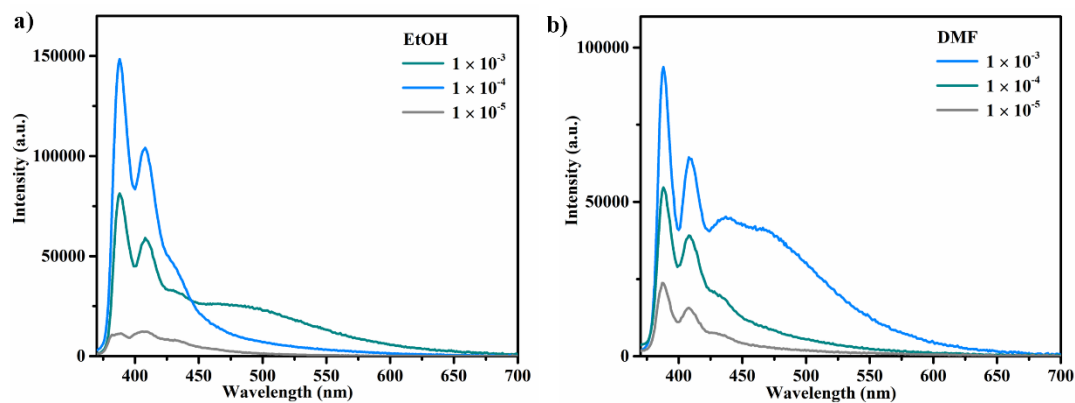

**Fig. S11** The fluorescent behaviors of organic ligand CzIP in different concentrations. (a) in ethanol (EtOH) from  $1 \times 10^{-5}$  to  $1 \times 10^{-3}$  mol/L; (b) in N,N-Dimethylformamide (DMF) from  $1 \times 10^{-5}$  to  $1 \times 10^{-3}$  mol/L.

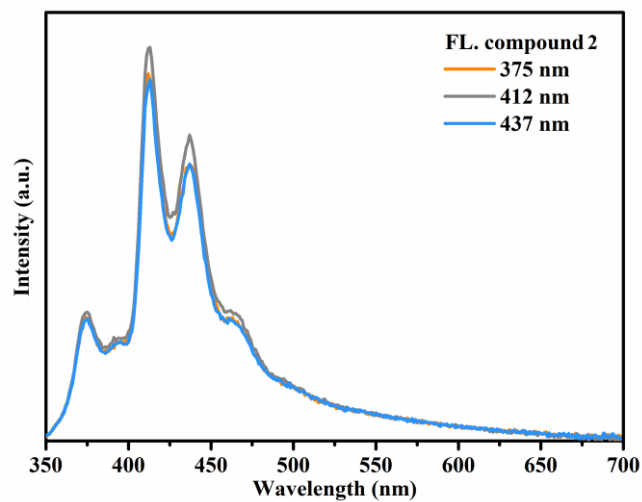

**Fig. S12** Fluorescence curves of compound 2 at 375, 412 and 467 nm.

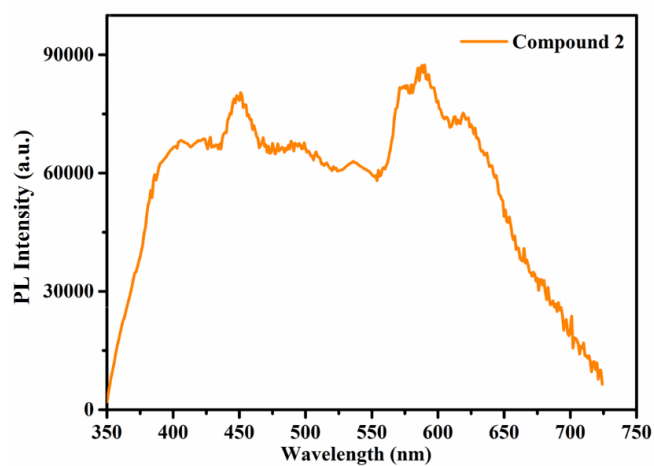

**Fig. S13** Photoluminescence (PL) curves of compound 2.



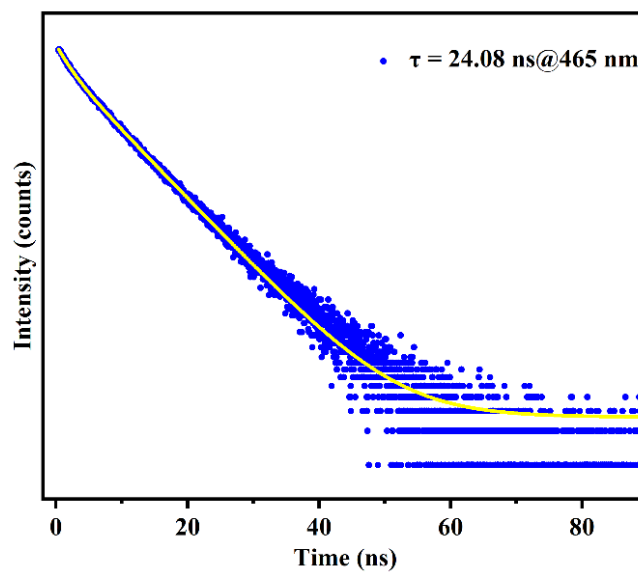

**Fig. S14** Fluorescence lifetime profile of compound 1 at 465 nm.

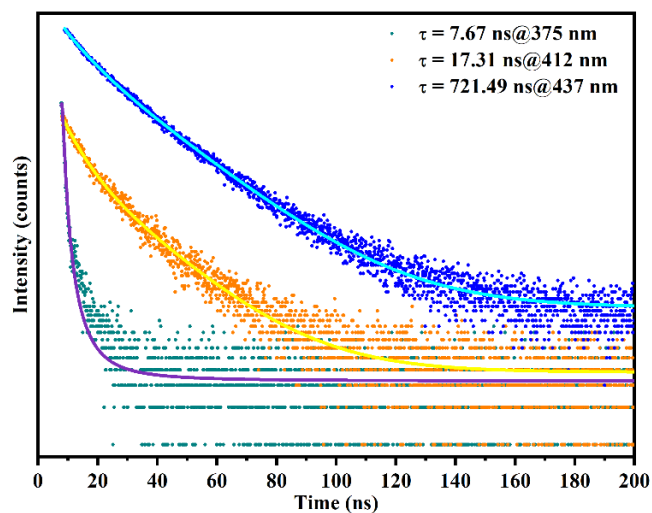

**Fig. S15** Fluorescence lifetime profile of compound 2 at 375, 412 and 437 nm, respectively.

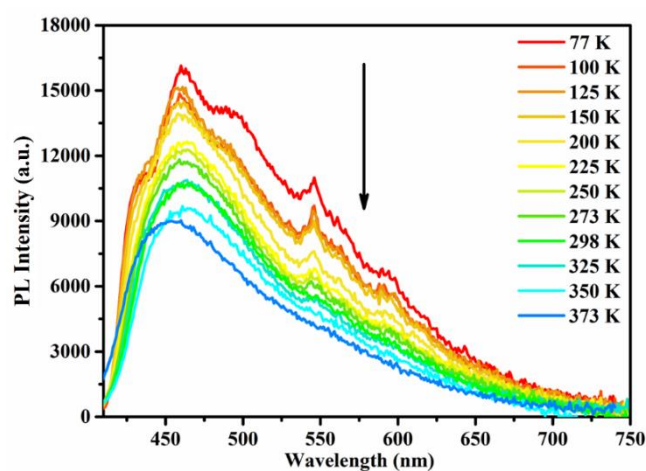

**Fig. S16** Phosphorescence spectra of as prepared crystals of compound 1 under the different temperatures without door-gated instrument.

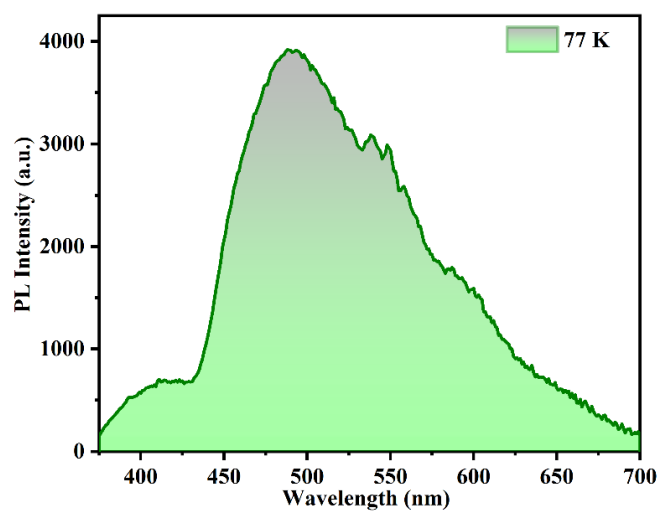

**Fig. S17** Phosphorescence spectra of organic ligand compound CzIP in  $1 \times 10^{-5}$  mol/L chloroform at 77 K.

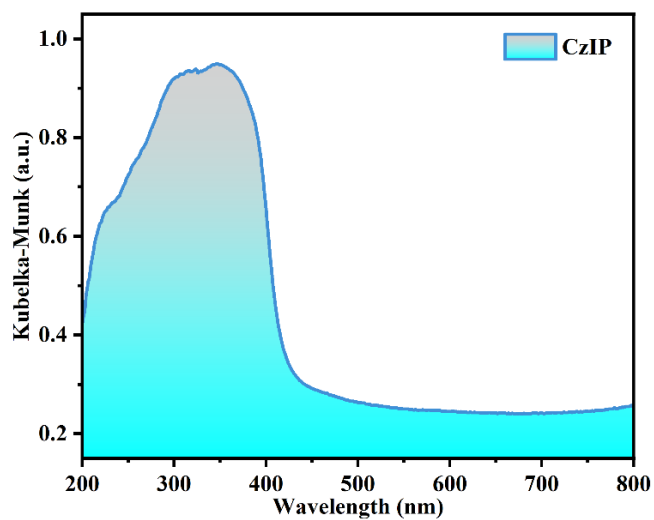

**Fig. S18** UV-Visible absorption spectra of organic ligand powder under ambient conditions.

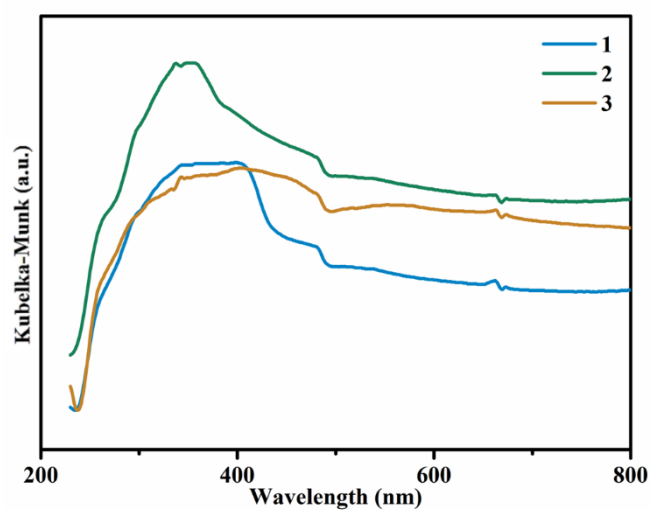

**Fig. S19** UV-Visible absorption spectra of compounds 1-3 under ambient conditions.

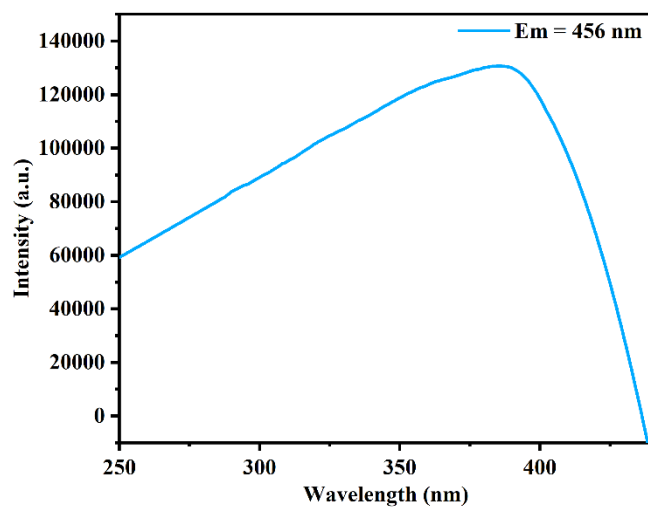

**Fig. S20** Fluorescence excitation spectra of Compound 1 at Em = 456 nm.

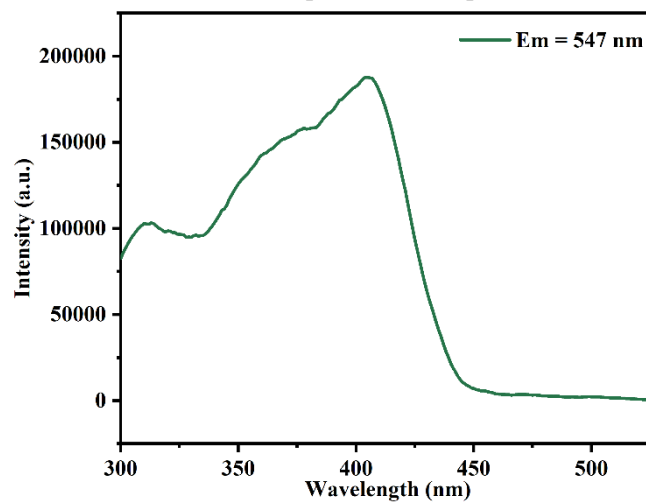

**Fig. S21** Phosphorescent excitation spectra of Compound 1 at Em = 547 nm.

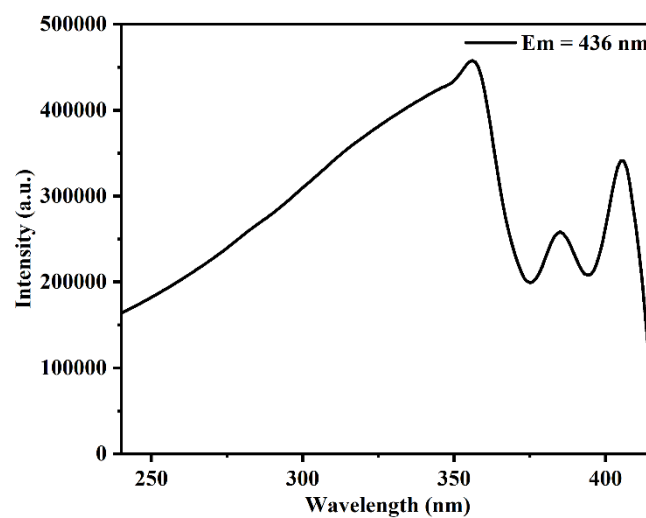

**Fig. S22** Fluorescence excitation spectra of Compound 2 at Em = 436 nm.

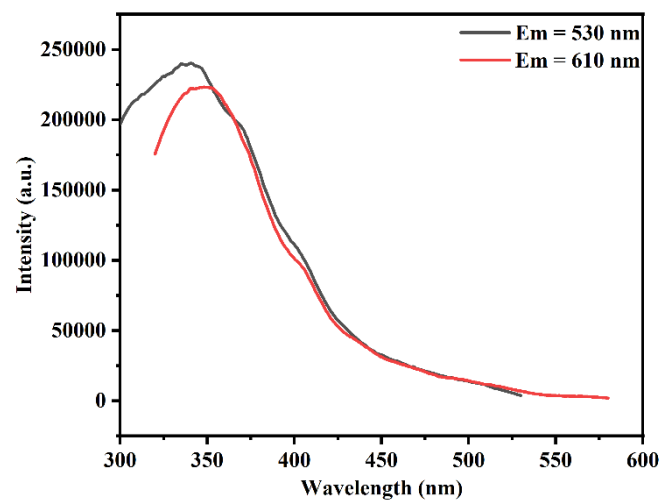

**Fig. S23** Phosphorescent excitation spectra of Compound 2 at  $E_m = 530$  and 610 nm.

### 3. Supplementary Tables

**Table S1. The crystallographic parameters of compounds 1-3.**

| Identification code                                         | Compound 1                                                                  | Compound 2                                                                   | Compound 3                                                                     |
|-------------------------------------------------------------|-----------------------------------------------------------------------------|------------------------------------------------------------------------------|--------------------------------------------------------------------------------|
| Empirical formula                                           | C <sub>20</sub> H <sub>11</sub> NO <sub>4</sub> Zn                          | C <sub>25</sub> H <sub>21</sub> N <sub>3</sub> O <sub>5</sub> Zn             | C <sub>40</sub> H <sub>26</sub> N <sub>2</sub> O <sub>10</sub> Zn <sub>2</sub> |
| Number of CCDC                                              | 2219861                                                                     | 2219862                                                                      | 2219863                                                                        |
| Formula weight                                              | 394.67                                                                      | 555.85                                                                       | 919.43                                                                         |
| Temperature/K                                               | 293(2)                                                                      | 293(2)                                                                       | 293(2)                                                                         |
| Crystal system                                              | monoclinic                                                                  | monoclinic                                                                   | 'triclinic                                                                     |
| Space group                                                 | <i>P</i> 2 <sub>1</sub> / <i>c</i>                                          | <i>P</i> 2 <sub>1</sub> / <i>c</i>                                           | <i>P</i> -1                                                                    |
| <i>a</i> / Å                                                | 21.0731(17)                                                                 | 16.7905(5)                                                                   | 8.6941(3)                                                                      |
| <i>b</i> / Å                                                | 4.6848(3)                                                                   | 7.6649(2)                                                                    | 10.0079(5)                                                                     |
| <i>c</i> / Å                                                | 16.4494(12)                                                                 | 17.8041(5)                                                                   | 21.4461(10)                                                                    |
| $\alpha$ / °                                                | 90                                                                          | 90                                                                           | 94.503(4)                                                                      |
| $\beta$ / °                                                 | 103.377(8)                                                                  | 95.146(3)                                                                    | 96.145(3)                                                                      |
| $\gamma$ / °                                                | 90                                                                          | 90                                                                           | 114.370(4)                                                                     |
| Volume/ Å <sup>3</sup>                                      | 1579.9(2)                                                                   | 2282.11(12)                                                                  | 1674.41(13)                                                                    |
| <i>Z</i>                                                    | 4                                                                           | 4                                                                            | 2                                                                              |
| $\rho_{\text{calc}}$ /cm <sup>3</sup>                       | 1.659                                                                       | 1.618                                                                        | 1.824                                                                          |
| $\mu$ / mm <sup>-1</sup>                                    | 1.582                                                                       | 0.999                                                                        | 1.338                                                                          |
| F(000)                                                      | 800                                                                         | 1120                                                                         | 912                                                                            |
| Crystal size/ mm <sup>3</sup>                               | 0.08 × 0.15 × 0.16                                                          | 0.10 × 0.12 × 0.16                                                           | 0.10 × 0.12 × 0.16                                                             |
| Radiation                                                   | Mo-K $\alpha$ ( $\lambda$ = 0.71073)                                        | Mo-K $\alpha$ ( $\lambda$ = 0.71073)                                         | Mo-K $\alpha$ ( $\lambda$ = 0.71073)                                           |
| 2 $\theta$ range for data collection/°                      | 5.082 to 57.000                                                             | 8.276 to 55.860                                                              | 7.560 to 55.176                                                                |
| Index ranges                                                | -22 ≤ <i>h</i> ≤ 28, -6 ≤ <i>k</i> ≤ 5, -18 ≤ <i>l</i> ≤ 22                 | -15 ≤ <i>h</i> ≤ 22, -8 ≤ <i>k</i> ≤ 9, -21 ≤ <i>l</i> ≤ 21                  | -10 ≤ <i>h</i> ≤ 9, -12 ≤ <i>k</i> ≤ 12, -27 ≤ <i>l</i> ≤ 28                   |
| Reflections collected                                       | 3693                                                                        | 4751                                                                         | 6926                                                                           |
| Independent reflections                                     | 2842 [ <i>R</i> <sub>int</sub> = 0.0625 <i>R</i> <sub>sigma</sub> = 0.0946] | 3827 [ <i>R</i> <sub>int</sub> = 0.0241, <i>R</i> <sub>sigma</sub> = 0.0365] | 5556 [ <i>R</i> <sub>int</sub> = 0.0242, <i>R</i> <sub>sigma</sub> = 0.0503]   |
| Goodness-of-fit on <i>F</i> <sup>2</sup>                    | 1.034                                                                       | 1.064                                                                        | 1.002                                                                          |
| <i>R</i> <sub>1</sub> [ <i>I</i> > 2 $\sigma$ ( <i>I</i> )] | <i>R</i> <sub>1</sub> = 0.0560, <i>wR</i> <sub>2</sub> = 0.1240             | <i>R</i> <sub>1</sub> = 0.0319, <i>wR</i> <sub>2</sub> = 0.0657              | <i>R</i> <sub>1</sub> = 0.0340, <i>wR</i> <sub>2</sub> = 0.0658                |
| <i>wR</i> <sub>2</sub> (all data)                           | <i>R</i> <sub>1</sub> = 0.0740, <i>wR</i> <sub>2</sub> = 0.1403             | <i>R</i> <sub>1</sub> = 0.0446, <i>wR</i> <sub>2</sub> = 0.0708              | <i>R</i> <sub>1</sub> = 0.0473, <i>wR</i> <sub>2</sub> = 0.0706                |

**Table S2. CIE, RGB and HSV values for the luminous colors of compounds 1.**

| Compound 1 | CIE (x,y)  | RGB           | HSV               | Hex codes |
|------------|------------|---------------|-------------------|-----------|
| Phos.      | 0.47, 0.47 | 255, 195, 2   | 45.77, 99.22, 100 | #FFC302   |
| FL         | 0.25, 0.29 | 153, 221, 255 | 200, 40, 100      | #99DDFF   |
| PL         | 0.33, 0.36 | 255, 255, 226 | 60, 11.37, 100    | #FFFFE2   |

**Table S3. CIE, RGB and HSV values for the luminous colors of compounds 2.**

| Compound 2 | CIE (x,y)  | RGB           | HSV               | Hex codes |
|------------|------------|---------------|-------------------|-----------|
| Phos.      | 0.47, 0.44 | 255, 180, 56  | 37.39, 78.04, 100 | #FFB438   |
| FL         | 0.24, 0.22 | 151, 162, 255 | 233.6, 40.78, 100 | #97A2FF   |
| PL         | 0.34, 0.33 | 255, 212, 212 | 0, 16.36, 100     | #FFD4D4   |

## 4. References

- 1 M. Zhou, P. Gao., Y. Jiang, Y. Zhou, J. Wu, X. Zhu and H. Fu, *Dyes Pigm.*, 2021, **195**, 109715.
- 2 G.M. Sheldrick, *Acta Crystallogr. C* 2015, **71**, 3–8.
- 3 L. J. Bourhis, O. V. Dolomanov, R. J. Gildea, J. A. K. Howard and H. Puschmann, *Acta Crystallogr. A*, 2015. **71**, 59–75.
